# Supplementary material for: Anti-Angiogenic miR-222, miR-195, and miR-21a Plasma Levels in T1DM Are Improved by Metformin Therapy, Thus Elucidating Its Cardioprotective Effect: The MERIT Study
Source: PubMed Central journal article supplement (PMC6214022; doi:10.3390/ijms19103242), 2018-10-19
Supplement: ijms-19-03242-s001.pdf [file ijms-19-03242-s001.pdf]

## Supplementary Information

Article

# Anti-angiogenic miR-222, miR-195, and miR-21a plasma levels in T1DM are Improved by Metformin Therapy, thus Elucidating its Cardioprotective Effect: The MERIT Study

Fahad W. Ahmed<sup>1,2,3</sup>, Sherin Bakhshab<sup>2,4,5</sup>, Inda T. Bastaman<sup>1,2,6</sup>, Rachel E. Crossland<sup>2</sup>, Michael Glanville<sup>2</sup> and Jolanta U. Weaver<sup>1,2,7,\*</sup>

<sup>1</sup> Department of Diabetes, Queen Elizabeth Hospital, Gateshead, Newcastle Upon Tyne NE9 6SH, UK; nfahadahmed@gmail.com (F.W.A.); itashab@gmail.com (I.T.B.)

<sup>2</sup> Institute of Cellular Medicine, Newcastle University, Newcastle Upon Tyne NE2 4HH, UK; sbakhshab@kau.edu.sa (S.B.); rachel.crossland@newcastle.ac.uk (R.E.C.); michael.glanville@newcastle.ac.uk (M.C.)

<sup>3</sup> Department of Diabetes and Endocrinology, Royal Sussex County Hospital, Brighton BN2 5BE, UK

<sup>4</sup> Biochemistry Department, Faculty of Science, King Abdulaziz University, Jeddah P.O. Box 80218, Saudi Arabia

<sup>5</sup> Center of Innovation in Personalized Medicine, King Abdulaziz University, Jeddah P.O. Box 80216, Saudi Arabia

<sup>6</sup> Faculty of Medicine, Universitas Indonesia, Jakarta 10430, Indonesia

<sup>7</sup> Cardiovascular Research Centre, Newcastle University, Newcastle Upon Tyne NE2 4HH, UK

\* Correspondence: Jolanta.Weaver@newcastle.ac.uk; Tel.: +44-191-445-2181; Fax: +44-191-4456186

**Trial registration:** ISRCTN26092132

URL: <http://controlled-trials.com/ISRCTN26092132> ; DOI: 10.1186/ISRCTN26092132

## Supplementary Figures

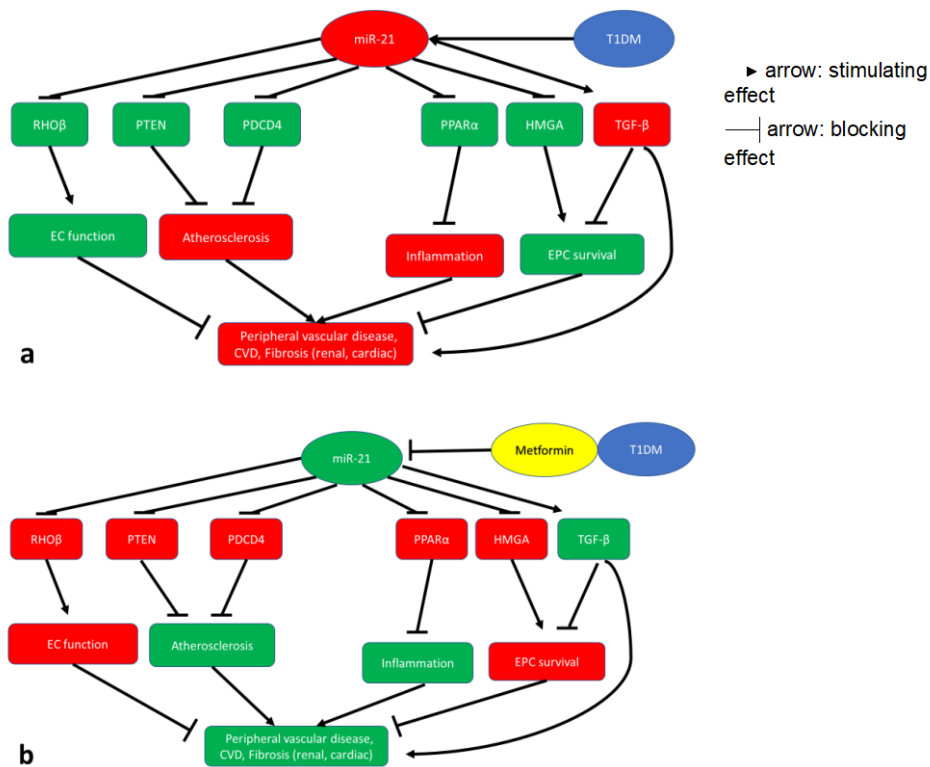

**Supplementary Figure S1. Flowchart of the suggested effect of miR-21 in T1DM.** a. Effect of miR-21 in the development of vascular pathology in T1DM patients. b. Effect of metformin on circulatory miR-21 levels. Green color represents downregulation, red color represents upregulation, blue color highlights T1DM and yellow metformin therapy.

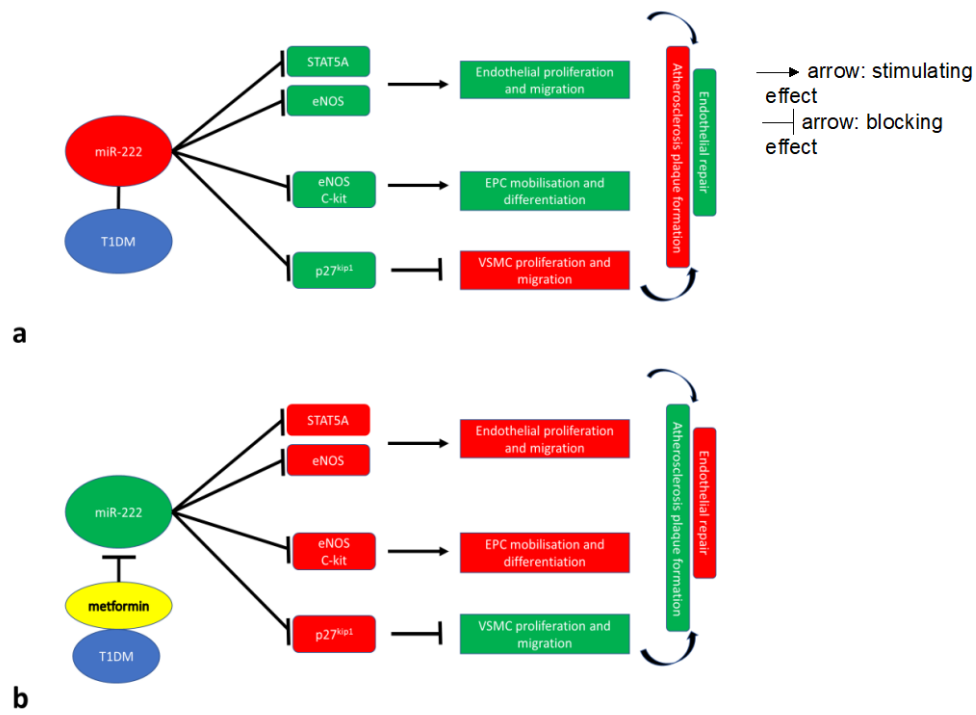

**Supplementary Figure S2. Flowchart of the proposed effect of miR-222 in T1DM.** a. Effect of miR-222 on the development of vascular pathology in T1DM patients. b. Effect of metformin on circulatory miR-222 levels. Green color represents down regulation, red color represents upregulation, blue color highlights T1DM and yellow metformin therapy.

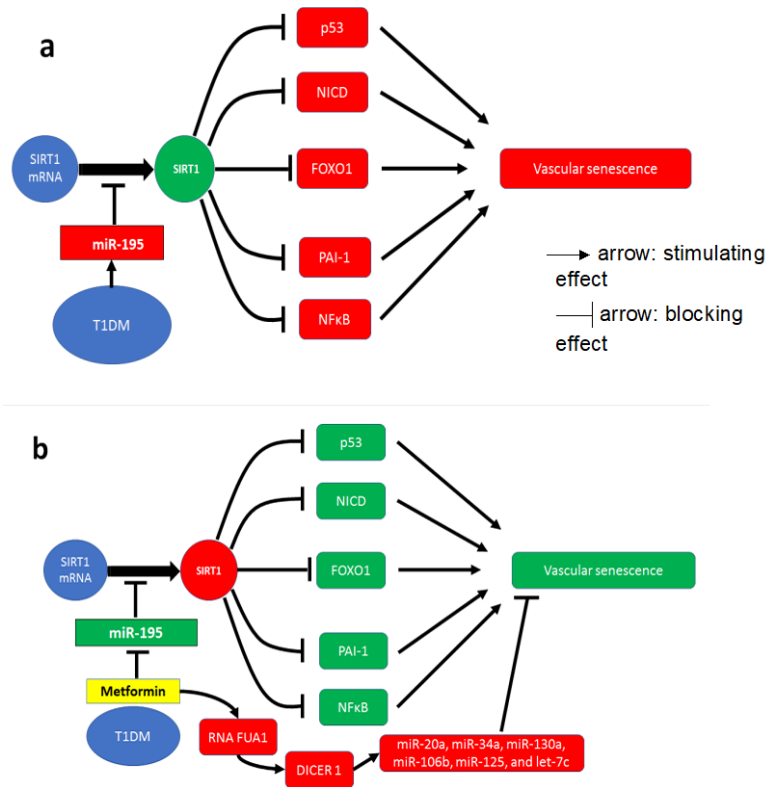

**Supplementary Figure S3. Flowchart of the proposed effect of miR-195 in T1DM.** a. The flowchart suggests the effect of miR-195 on the development of vascular pathology in T1DM patients. b. Effect of metformin on circulatory miR-195 levels. Green colour represents down regulation, red colour represents upregulation, blue colour highlights T1DM and yellow metformin therapy.
